# Supplementary material
Source: PubMed Central journal article supplement (PMC5038081)
Supplement: IAI.00583-16_zii999091832so1.pdf [file IAI.00583-16_zii999091832so1.pdf]

1 **Supplemental Information**

2

3 **Materials and Methods**

4 **Western blots.** YAMC or HeLa cells were seeded in a six well plate and incubated overnight at  
5 33 °C or 37 °C. Cells were intoxicated with 10 nM TcdA or TcdB for 3 or 1 hours, respectively,  
6 washed, and then lysed. Antibodies against TcdA (ab19953, Abcam), TcdB (20B3) (34),  
7 glucosylated Rac1 (clone 23A8, EMD Millipore), or total Rac1 (clone 102, BD Biosciences)  
8 were used to probe the lysates and were detected with anti-mouse HRP (7076, Cell Signaling).

9 **Live/Dead assay.** HeLa cells were seeded in a 96 well plate and incubated overnight at 33 °C or  
10 37 °C. Cells were challenged with 10 nM TcdA, 100 pM TcdA, 10 nM TcdB, or 10 pM TcdB  
11 and incubated at 33 °C or 37 °C. Brightfield images were captured on an Olympus IX73  
12 equipped with a Q color 3 camera at 1 h, 4 h, and 18 h post-intoxication. One hour prior to the  
13 18 h acquisition, cells were washed with PBS and treated with LIVE/DEAD  
14 Viability/Cytotoxicity Kit for mammalian cells (ThermoFisher, L3224) for 30 min at room  
15 temperature. Images were acquired using the fluorescein and rhodamine filter sets on the  
16 Olympus IX73.

17

18 **Figure Legends**

19 **Fig. S1. TcdA and TcdB bind YAMC cells and glucosylate Rac1 similarly at 33 °C and 37**  
20 **°C.** YAMC cells were seeded overnight at 33 °C or 37 °C and challenged with A, 10 nM TcdA  
21 for 3 hours or B, 10 nM TcdB for 1 hour. Cells were washed, lysed, and lysates were  
22 immunoblotted for TcdA, TcdB, non-glucosylated Rac1, and total Rac1.

23 **Fig. S2. TcdA and TcdB bind HeLa cells and glucosylate Rac1 similarly at 33 °C and 37**  
24 **°C.** HeLa cells were seeded overnight at 33 °C or 37 °C and challenged with A, 10 nM TcdA for  
25 3 hours or B, 10 nM TcdB for 1 hour. Cells were washed, lysed, and lysates were  
26 immunoblotted for TcdB, non-glucosylated Rac1, and total Rac1.

27 **Fig. S3. TcdA and TcdB induce similar cytopathic effects and cytotoxicity at 33 °C and 37**  
28 **°C.** HeLa cells were plated and incubated overnight at 33 °C or 37 °C, intoxicated with TcdA  
29 (10 nM, 100 pM), TcdB (10 nM, 10 pM), or mock buffer and incubated at 33 °C or 37 °C. Cell  
30 rounding was determined by brightfield imaging after an overnight exposure. Cytotoxicity was  
31 assessed by addition of a live-dead indicator prior to analyzing the overnight exposure.

32

33 **Fig. S4. TcdB D286/288N induces ROS production and cell death similarly to wild-type**  
34 **TcdB.** A, YAMCs were tested for ROS production in response to TcdB (black bars) or TcdB  
35 D286/288N (gray bars) after 6 h using a fluorescent ROS reporter. Statistical analysis by two-  
36 way ANOVA revealed no statistical significance between TcdB and TcdB D286/288N. B,  
37 Viability of YAMCs was assessed in response to TcdA (white bars), TcdA D285/287N (light  
38 gray bars), TcdB (black bars), and TcdB D286/288N (dark gray bars) after 18 hours. Data  
39 represent the average of three experiments performed in triplicate. Error bars represent the  
40 standard deviation of the means.

41

42 **Fig. S5. Simultaneous intoxication with TcdA and TcdB results in cell death more similar**  
43 **to TcdB.** Viability of YAMCs challenged with 10 nM TcdA (white bars), 10 nM TcdB (black  
44 bars), or 10 nM TcdA + 10 nM TcdB (gray bars) was assessed 18 hours after intoxication. Data

45 represent the average of three experiments performed in triplicate. Error bars represent the  
46 standard deviation of the means.

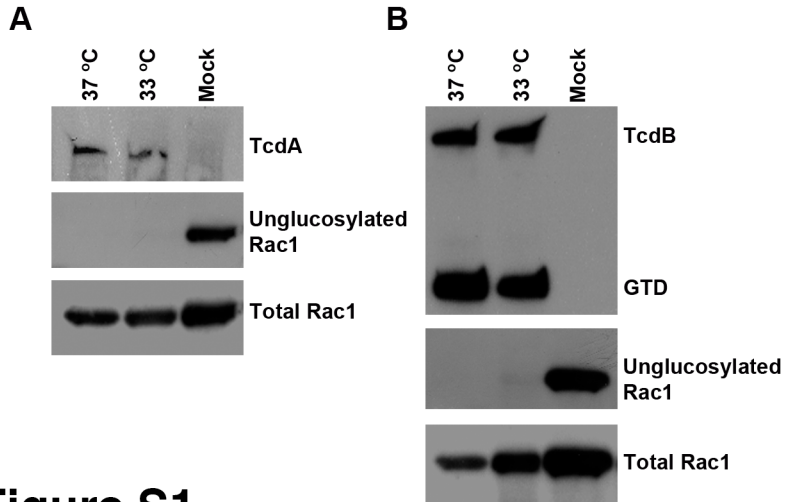

47 **Figure S1**

48

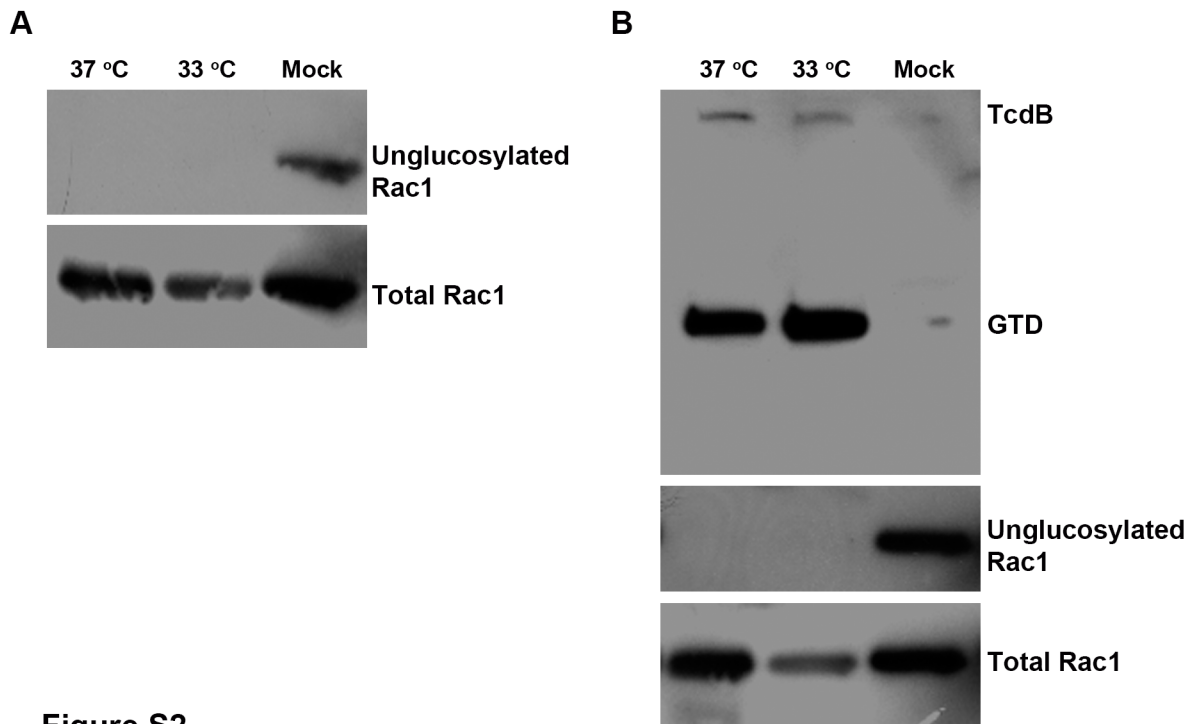

49 **Figure S2**

50

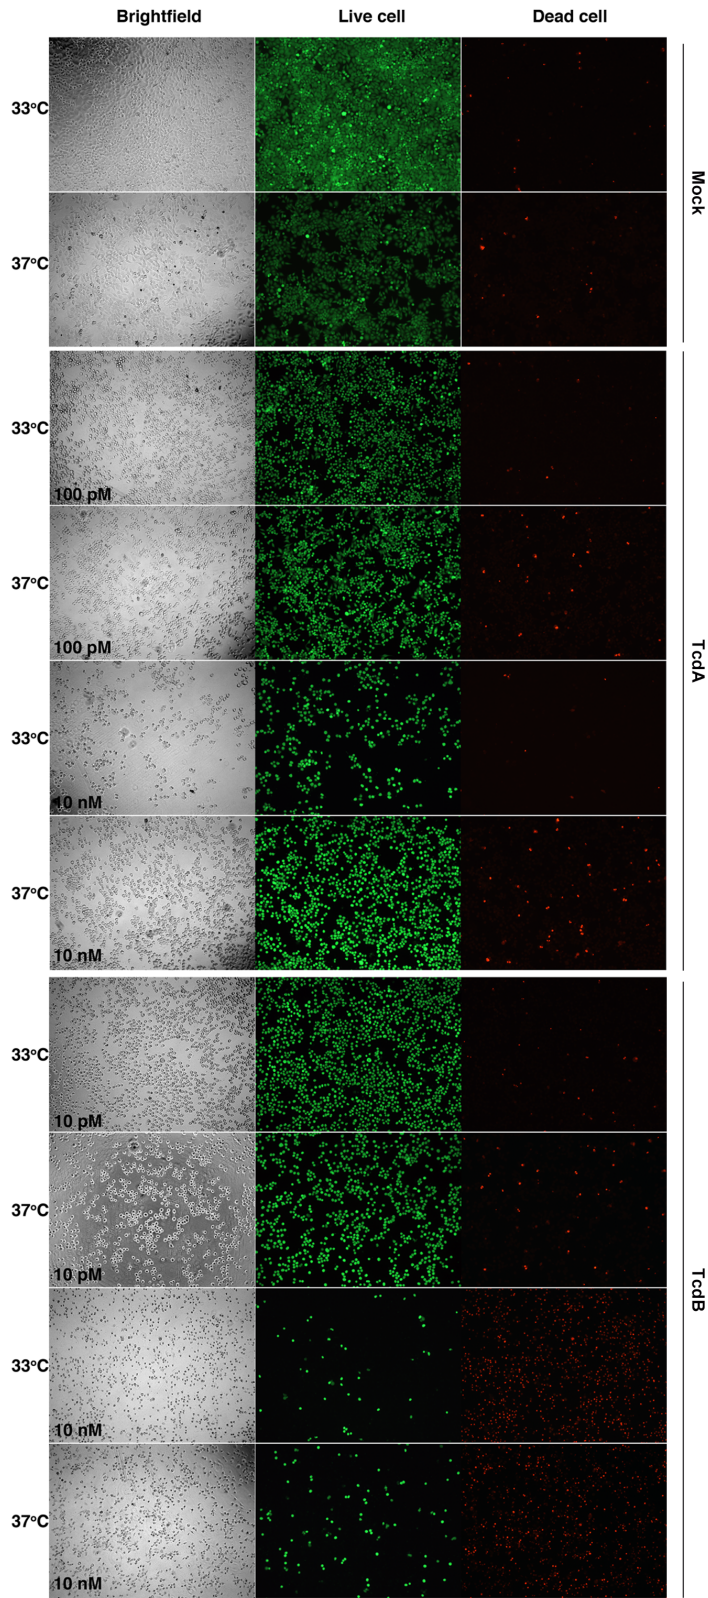

Figure S3

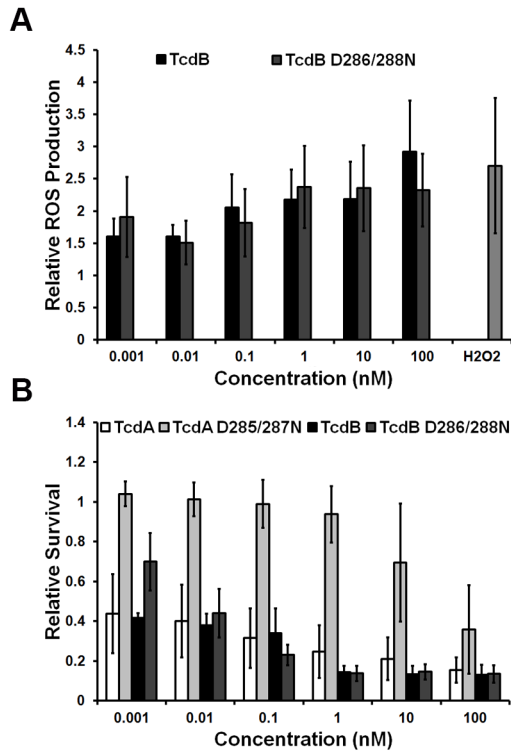

**Figure S4**

52

53

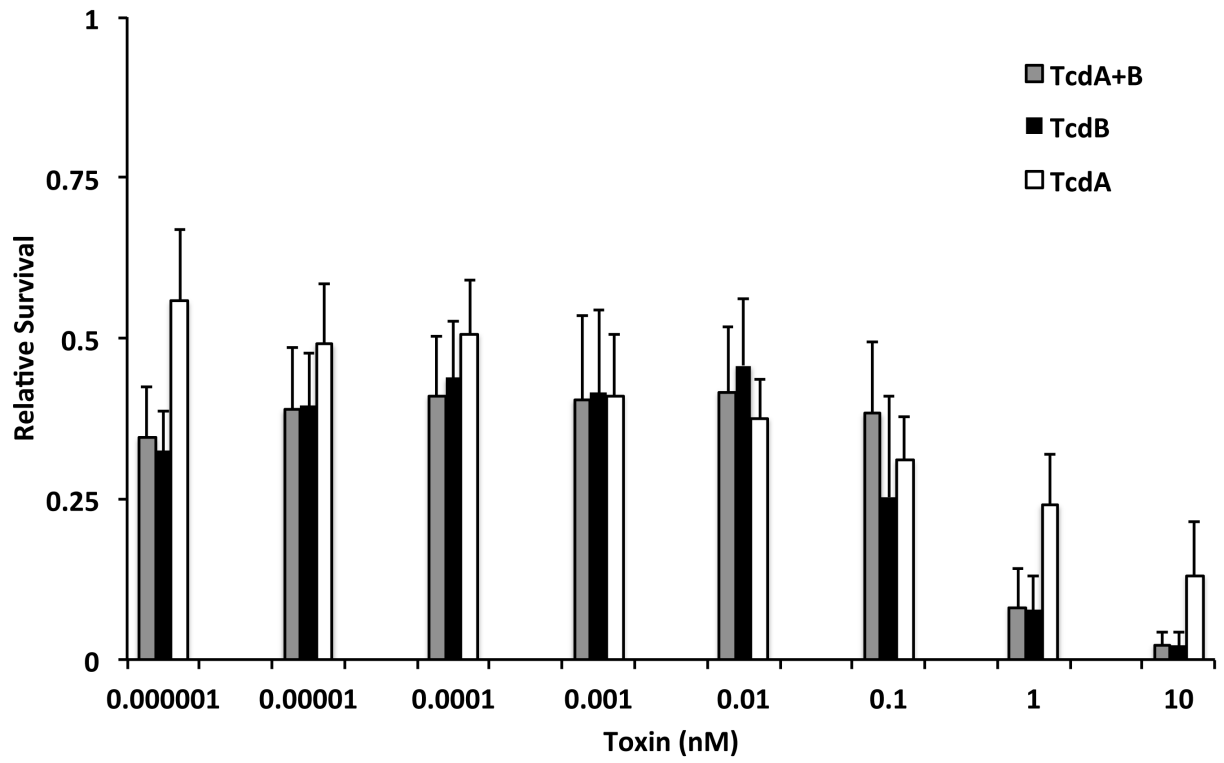

54

Figure S5
